# Supplementary material for: HIV Screening via Fourth-Generation Immunoassay or Nucleic Acid Amplification Test in the United States: A Cost-Effectiveness Analysis
Source: PubMed Central journal article supplement (PMC3218000; doi:10.1371/journal.pone.0027625), 2011-11-16
Supplement: pone.0027625.s004.pdf [file pone.0027625.s004.pdf]

Table S1: Modes of HIV transmission

|              | Male MSM     | Male MSM/IDU                   | Male IDU                       | Male Other   | Female IDU                     | Female Other |
|--------------|--------------|--------------------------------|--------------------------------|--------------|--------------------------------|--------------|
| Male MSM     | Homosexual   | Homosexual                     |                                |              | Heterosexual                   | Heterosexual |
| Male MSM/IDU | Homosexual   | Homosexual<br>Needle-sharing   | Needle-sharing                 |              | Heterosexual<br>Needle-sharing | Heterosexual |
| Male IDU     |              | Needle-sharing                 | Needle-sharing                 |              | Heterosexual<br>Needle-sharing | Heterosexual |
| Male Other   |              |                                |                                |              | Heterosexual                   | Heterosexual |
| Female IDU   | Heterosexual | Heterosexual<br>Needle-sharing | Heterosexual<br>Needle-sharing | Heterosexual | Needle-sharing                 |              |
| Female Other | Heterosexual | Heterosexual                   | Heterosexual                   | Heterosexual |                                |              |

MSM = men who have sex with men; IDU = injection drug user; Other = low-risk general population.
